# Supplementary material for: Comparative performance and transcriptomics of tomato (Solanum lycopersicum) in response to Bombus terrestris (Hymenoptera, Apidae) and 2,4-dichlorophenoxyacetic acid
Source: Springer Nature journal article supplement (doi:10.1007/s11829-023-10024-7), 2023-12-18
Supplement: 11829_2023_10024_MOESM1_ESM.pdf [file 11829_2023_10024_MOESM1_ESM.pdf]

**Comparative Performance and Transcriptomics of Tomato (*Solanum lycopersicum*) in Response to *Bombus terrestris* (Hymenoptera, Apidae) and Hormone (2,4-Dichlorophenoxyacetic acid)**

Xunbing Huang<sup>a#\*</sup>, Ying Huang<sup>a</sup>, Xiaoyan Dai<sup>b</sup>, Li Zheng<sup>b#</sup>, Hao Chen<sup>b</sup>, Yan Liu<sup>b</sup>, Peiqun Zhu<sup>c</sup>,

Shuer Zhang<sup>d</sup>, Junyang Jia<sup>e</sup>, Yifan Zhai<sup>b\*</sup>

<sup>(a)</sup> College of Agriculture and Forestry Science, Linyi University, Linyi 276000, P.R. China;

<sup>(b)</sup> Institute of Plant Protection, Shandong Academy of Agricultural Sciences, Jinan 250100, P.R. China;

<sup>(c)</sup> Feixian Agricultural Technology Extension Center, Feixian 273400, P.R. China; <sup>(d)</sup> Shandong animal husbandry station, Jinan 250022 P.R. China; <sup>(e)</sup> Agricultural affairs section, Linyi government affairs service center, Linyi 276000, P.R. China)

<sup>#</sup>The author contributed equally to this work.

<sup>\*</sup>Author for correspondence E-mail: xunbingh@163.com; zyifan@tom.com

**Table S1 Summary of quality for sample sequencing data**

| Sample        | raw_reads | clean_reads | clean_bases | error_rate | Q20   | Q30   | GC_pct |
|---------------|-----------|-------------|-------------|------------|-------|-------|--------|
| Bumblebee I   | 48762446  | 46651184    | 7.0G        | 0.03       | 97.44 | 92.21 | 45.92  |
| Bumblebee II  | 46406730  | 43608146    | 6.54G       | 0.03       | 97.65 | 92.99 | 45.53  |
| Bumblebee III | 46139742  | 38970768    | 5.85G       | 0.03       | 97.81 | 93.39 | 46.97  |
| Hormone I     | 46023700  | 42536362    | 6.38G       | 0.03       | 97.75 | 93.24 | 44.73  |
| Hormone II    | 46763002  | 44511318    | 6.68G       | 0.03       | 97.76 | 93.28 | 45.88  |
| Hormone III   | 47779726  | 45514128    | 6.83G       | 0.03       | 97.66 | 93.05 | 46.01  |

**Table S2 Comparison statistics between samples and reference genomes**

| sample        | total_map        | unique_map       | multi_map      | positive_map     | negative_map     | splice_map       | unsplice_map     | proper_map       |
|---------------|------------------|------------------|----------------|------------------|------------------|------------------|------------------|------------------|
| Bumblebee I   | 44183276(94.71%) | 43006624(92.19%) | 1176652(2.52%) | 21441145(45.96%) | 21565479(46.23%) | 14348784(30.76%) | 28657840(61.43%) | 41493136(88.94%) |
| Bumblebee II  | 42325854(97.06%) | 41696913(95.62%) | 628941(1.44%)  | 20830826(47.77%) | 20866087(47.85%) | 13299644(30.5%)  | 28397269(65.12%) | 40581152(93.06%) |
| Bumblebee III | 37804816(97.01%) | 37265618(95.62%) | 539198(1.38%)  | 18617634(47.77%) | 18647984(47.85%) | 12310331(31.59%) | 24955287(64.04%) | 36174650(92.83%) |
| Hormone I     | 40924411(96.21%) | 40310749(94.77%) | 613662(1.44%)  | 20139686(47.35%) | 20171063(47.42%) | 12990025(30.54%) | 27320724(64.23%) | 39121794(91.97%) |
| Hormone II    | 43273318(97.22%) | 42626282(95.77%) | 647036(1.45%)  | 21295788(47.84%) | 21330494(47.92%) | 14259785(32.04%) | 28366497(63.73%) | 41458550(93.14%) |
| Hormone III   | 44067556(96.82%) | 43445716(95.46%) | 621840(1.37%)  | 21704704(47.69%) | 21741012(47.77%) | 12896706(28.34%) | 30549010(67.12%) | 42084204(92.46%) |

**Table S3 Designed sequences of qRT-PCR primers for candidate genes**

| Gene_id   | Gene_description            | Abbreviation | log2.Fold change<br>Bumblebee VS. Hormone | Primer  |                            |
|-----------|-----------------------------|--------------|-------------------------------------------|---------|----------------------------|
|           |                             |              |                                           | Forward | Reverse                    |
| 100191129 | anthocyanin acyltransferase | ATH          | 8.709018517                               | Forward | CACTTGCTGGAAGGTGTCTGAAGA   |
|           |                             |              |                                           | Reverse | GCCAGAGAATCCATCACCTGTTGT   |
| 544150    | dihydroflavonol 4-reductase | DIH          | 10.475046412                              | Forward | GCCATTGAGACTTGCCGACAGA     |
|           |                             |              |                                           | Reverse | GCGAGAGCCTTCAGTTCTTCCA     |
| 100736504 | flavonoid 3'5' hydroxylase  | FLH          | 4.520702806                               | Forward | CACTGCTGGTACAGACACTTCATCA  |
|           |                             |              |                                           | Reverse | CATTCCCACGAGGTTCAATCTTTC   |
| 101266562 | proteinase inhibitor 1-like | PII          | 7.52785265                                | Forward | AGCCCAACTTGGAAATGTCAAGGAAA |
|           |                             |              |                                           | Reverse | CCAACCACAGGCATTGATACAGCAT  |
| 101265368 | proteinase inhibitor I-B    | PIB          | 2.922507615                               | Forward | CCCGACCCGTTACAAAGTCCCTA    |
|           |                             |              |                                           | Reverse | GCAAGAAGCAAGAAAGCAAGCACAT  |
| 101254142 | cellulose synthase-like     | CS           | 11.30924054                               | Forward | GGAGAAGACGAAGATGACGCCTATG  |

|           |                                     |               |              |         |                           |
|-----------|-------------------------------------|---------------|--------------|---------|---------------------------|
|           | protein D4                          |               |              | Reverse | GCCAGCACCAGCAACACCTT      |
| 101267720 | sucrose synthase                    | <i>SUC</i>    | 5.037144557  | Forward | GGTGTGGTGGAGACAGAAGGAA    |
|           |                                     |               |              | Reverse | TTCGTCAGCCAGCCTTCTATGAG   |
| 101249782 | callose synthase 5                  | <i>CAL</i>    | 6.466395466  | Forward | GCCGCCACCACTACCTTCTCTA    |
|           |                                     |               |              | Reverse | CTCTGTCTGCTTGTTCCTCCTTGT  |
| 101260990 | salicylic acid-binding protein<br>2 | <i>SAB2</i>   | -10.31959265 | Forward | TGGAGGTTGGTGTGGTACAAACT   |
|           |                                     |               |              | Reverse | AATATGGATGGCAGAGGCTCTCAT  |
| 543526    | jasmonic acid 2                     | <i>JA2</i>    | -4.595828058 | Forward | CGGATAAGGTGATAACTTCGCAAGG |
|           |                                     |               |              | Reverse | ATGGCTGTATTCATTACTGCTGTGT |
| 101244732 | auxin-responsive protein<br>SAUR68  | <i>SAUR68</i> | -7.712154354 | Forward | CAGCCATGCAGAGGAAGAGGATT   |
|           |                                     |               |              | Reverse | AGAAGTCGAACAGCAAGAAGAAGGA |
| 101268293 | auxin-responsive protein<br>SAUR78  | <i>SAUR78</i> | -10.57095078 | Forward | GGCGTAGCAGCAACTCATCATCA   |
|           |                                     |               |              | Reverse | AACAGCACGACTTCACATCCAAC   |
| 101247499 | auxin-responsive protein<br>SAUR50  | <i>SAUR50</i> | -4.465197299 | Forward | TCAAACCACACCTCAAAGTCACCAA |
|           |                                     |               |              | Reverse | TCTCGCTGATTAAAGGGCAGTCTG  |
| 544056    | TAS14 peptide                       | <i>TAS14</i>  | -6.787759195 | Forward | GCACAATACGGCAATCAAGACCAA  |
|           |                                     |               |              | Reverse | TGTTGTCCAGGCATCTTCTCCATT  |

**Table S4 Quantitative real-time PCR (qRT-PCR) analysis of 14 candidate genes**

| Gene_id   | Gene_description                      | Abbreviation  | log2.Fold_change<br>Bumblebee VS.<br>Hormone | Relative gene expression of<br>sample treated by<br>bumblebee | Relative gene expression<br>of sample treated by<br>hormone |
|-----------|---------------------------------------|---------------|----------------------------------------------|---------------------------------------------------------------|-------------------------------------------------------------|
| 100191129 | anthocyanin acyltransferase           | <i>ATH</i>    | 8.709018517                                  | 16.32±3.084                                                   | 0.929±0.258                                                 |
| 544150    | dihydroflavonol 4-reductase           | <i>DIH</i>    | 10.475046412                                 | 20.68±4.961                                                   | 0.961±0.263                                                 |
| 100736504 | flavonoid 3'5' hydroxylase            | <i>FLH</i>    | 4.520702806                                  | 8.6±2.367                                                     | 0.952±0.256                                                 |
| 101266562 | proteinase inhibitor 1-like           | <i>PII</i>    | 7.52785265                                   | 13.68±1.096                                                   | 0.966±0.143                                                 |
| 101265368 | proteinase inhibitor I-B              | <i>PIB</i>    | 2.922507615                                  | 3.93±1.56                                                     | 0.938±0.299                                                 |
| 101254142 | Cellulose synthase-like<br>protein D4 | <i>CS</i>     | 11.30924054                                  | 19.68±2.932                                                   | 0.995±0.288                                                 |
| 101267720 | sucrose synthase                      | <i>SUC</i>    | 5.037144557                                  | 11.67±2.316                                                   | 0.946±0.161                                                 |
| 101249782 | callose synthase 5                    | <i>CAL</i>    | 6.466395466                                  | 15.89±3.281                                                   | 0.975±0.149                                                 |
| 101260990 | salicylic acid-binding protein<br>2   | <i>SAB2</i>   | -10.31959265                                 | 0.463±0.097                                                   | 0.965±0.099                                                 |
| 543526    | jasmonic acid 2                       | <i>JA2</i>    | -4.595828058                                 | 0.262±0.091                                                   | 0.997±0.086                                                 |
| 101244732 | auxin-responsive protein<br>SAUR68    | <i>SAUR68</i> | -7.712154354                                 | 0.496±0.075                                                   | 0.953±0.153                                                 |
| 101268293 | auxin-responsive protein<br>SAUR78    | <i>SAUR78</i> | -10.57095078                                 | 0.389±0.066                                                   | 1.010±0.128                                                 |
| 101247499 | auxin-responsive protein<br>SAUR50    | <i>SAUR50</i> | -4.465197299                                 | 0.1269±0.086                                                  | 0.982±0.112                                                 |
| 544056    | TAS14 peptide                         | <i>TAS14</i>  | -6.787759195                                 | 0.2116±0.079                                                  | 0.932±0.136                                                 |
